# Supplementary material
Source: publisher figshare collection journal article supplement (https://acs.figshare.com/ndownloader/files/10307367)
Supplement: Supplementary file 1 [file 10307367]

## Supporting Information

### Re-examining the Role of Dichloramine in High-Yield NDMA Formation from *N,N*-dimethyl- $\alpha$ -arylamines

*Meredith E. Huang, Shiyang Huang, Daniel L. McCurry\**

Astani Department of Civil and Environmental Engineering, University of Southern California,  
Los Angeles, CA 90089

\*Corresponding author phone: (213) 740-0762; e-mail: dmccurry@usc.edu

## Contents

|                                                                                                                                    |     |
|------------------------------------------------------------------------------------------------------------------------------------|-----|
| Text S1: Reagents                                                                                                                  | S3  |
| Text S2: HPLC-UV Analysis of NDMA                                                                                                  | S4  |
| Text S3: NDMA formation from an expanded range of molar ratios                                                                     | S5  |
| Table S1: Previously reported yields of NDMA from dimethylamine                                                                    | S6  |
| Table S2: Previously reported yields of NDMA from ranitidine                                                                       | S7  |
| Table S3: Kinetic model equations and rate constants                                                                               | S8  |
| Figure S1: Example NDMA standard curve                                                                                             | S9  |
| Figure S2: NDMA molar yield as a function of chloramine dose from DFUR                                                             | S10 |
| Figure S3: Modeled reaction kinetics of dimethylamine, chloramines, and UDMH-Cl                                                    | S11 |
| Figure S4: Modeled concentrations of UDMH-Cl as a function of chloramine dose                                                      | S12 |
| Figure S5: Modeled reaction kinetics of dimethylamine, UDMH-Cl, NDMA, and unknown product 'prod7' as a function of chloramine dose | S13 |
| Figure S6: Modeled concentrations of ranitidine, protonated ranitidine, monochloramine, and dichloramine at a range of pH values   | S14 |
| Figure S7: Modeled concentrations of dichloramine during simulated chloramination of dimethylamine.                                | S15 |
| References                                                                                                                         | S16 |

**Text S1: Reagents.** NDMA precursors (Figure 1) were obtained commercially as follows:

Dimethylamine hydrochloride (DMA) (99%; Sigma), Ranitidine (99%; Alfa Aesar), *N,N*-dimethylbenzylamine (DMBzA) ( $\geq 99\%$ ; Sigma), 5-(dimethylaminomethyl)-furfuryl alcohol hydrochloride (DFUR) (98%; Sigma), 2-(dimethylaminomethyl)-aniline (DMAMA) (Sigma). NDMA was obtained as a 5 g/L analytical standard in methanol (MeOH) from Sigma and used to prepare 500 mg/L stocks in acetonitrile, which were stored at  $-20\text{ }^{\circ}\text{C}$ . Phosphate buffers were prepared from a mixture of monobasic and dibasic potassium phosphates (99%; Acros Organics), and adjusted to pH 7.0 with 1 M NaOH or HCl. Monochloramine stocks were prepared fresh daily as described previously.<sup>1</sup> Briefly: a 40 mM free chlorine solution was prepared from a sodium hypochlorite stock (reagent grade; Sigma), which was standardized daily ( $\epsilon_{292} = 365\text{ M}^{-1}\text{ cm}^{-1}$ ) on a Cary 60 ultraviolet-visible spectrophotometer (Agilent Technologies, Santa Clara, CA). This solution was slowly titrated into an equal volume of 48 mM ammonium chloride ( $\geq 99.5\%$ ; Sigma) at pH 8.5. Dichloramine was prepared by titrating  $\sim 20\text{ mM}$  solutions of monochloramine to pH 3.7 with 1 M HCl and maintaining at pH 3.7 via periodic addition of HCl until reaction completion ( $\sim 1\text{ h}$ ). Dichloramine solutions were used within 1 h. Monochloramine and dichloramine were standardized spectrophotometrically as described previously.<sup>2</sup>

**Text S2: HPLC-UV Analysis of NDMA.** Aqueous samples were injected (100  $\mu$ L) and separated on a Poroshell 120 column (C18,  $4.6 \times 100$  mm  $\times$  2.7  $\mu$ m; Agilent) maintained at 30 °C with an integrated column heater. The mobile phase consisted of 10 mM phosphate in Milli-Q water (pH 9) and methanol (HPLC grade, Omnisolv) supplied at 1.0 mL/min according to the following program: 5% MeOH for 2 minutes, followed by a 2 min gradient to 50% MeOH, followed by 5 min isocratic at 50% MeOH, followed by a 0.1 min gradient to 5% MeOH, followed by 2.9 min isocratic at 5% MeOH, for 12 min total analysis time. NDMA was detected using a photodiode array detector at 228 nm<sup>3</sup>, at a retention time of 2.1 min.

**Text S3: NDMA formation from an expanded range of molar ratios.** To confirm that elevated NDMA yields from dichloramine was not confined to the set of experimental conditions used above (100  $\mu$ M; 1 – 20 M.E. chloramines), two additional experiments were performed with DFUR as a representative precursor. To evaluate lower doses of chloramines, 1000  $\mu$ M DFUR was treated with 0.01 – 10 M.E. of chloramines (Figure S2A). Dichloramine consistently formed more NDMA than monochloramine chloramine doses <5 M.E. At the highest dose (5 M.E.), NDMA yield from dichloramine declined somewhat, possibly due to intermediate-oxidizing side reactions, as discussed in the manuscript, or rapid breakpoint reactions at the elevated dichloramine concentration (5 mM). Loss of combined chlorine to breakpoint has previously been shown to proceed faster at higher starting concentrations. Jafvert and Valentine (1992) showed that at pH 7 and with a Cl/N ratio of 2, combined chlorine was lost within 10 minutes at a starting concentration of ~0.1 mM versus ~5 minutes at a starting concentration of 0.2 mM. Similar results were observed at pH 6 and pH 8. To evaluate formation from a lower starting concentration, and higher oxidant doses, 10  $\mu$ M DFUR was treated with 1 – 1000 M.E. of monochloramine and 1 – 300 M.E. of dichloramine (Figure S2B). Dichloramine treatment consistently produced higher NDMA yields than monochloramine. NDMA yields from monochloramine treatment began to approach yields from dichloramine at the highest doses (100 – 1000 M.E.), likely due to chlorine transfer reactions producing sufficient dichloramine for NDMA formation.

**Table S1:** Previously reported yields of NDMA from dimethylamine under indicated reaction conditions.

| [DMA] <sub>0</sub> | [NH <sub>2</sub> Cl] <sub>0</sub> | [NH <sub>2</sub> Cl] <sub>0</sub> /<br>[DMA] <sub>0</sub> | pH  | Rxn time<br>(h) | NDMA<br>yield (%) | Reference |
|--------------------|-----------------------------------|-----------------------------------------------------------|-----|-----------------|-------------------|-----------|
| 73 µg/L            | 2 mM                              | 1233                                                      | 6.8 | 240             | 0.5%              | (4)       |
| 0.1 mM             | 2 mM                              | 20                                                        | 6.9 | 240             | 2.6%              | (5)       |
| 0.1 mM             | 2 mM                              | 20                                                        | 7   | 240             | 3.0%              | (6)       |
| 500 nM             | 2.5 mM                            | 5000                                                      | 8   | 24              | 2.3%              | (7)       |
| 200 nM             | 100 mg/L                          | 7042                                                      | 7.5 | 120             | 1.2%              | (8)       |
| 160 nM             | 100 mg/L                          | 8803                                                      | 7.5 | 120             | 1.5%              | (9)       |

**Table S2:** Previously reported yields of NDMA from ranitidine under indicated reaction conditions.

| [Ranitidine] <sub>0</sub> | [NH <sub>2</sub> Cl] <sub>0</sub> | [NH <sub>2</sub> Cl] <sub>0</sub> /<br>[Ranitidine] <sub>0</sub> | pH  | Rxn time<br>(h) | NDMA yield<br>(%) | Reference |
|---------------------------|-----------------------------------|------------------------------------------------------------------|-----|-----------------|-------------------|-----------|
| 25 nM                     | 28.4 mg/L                         | 16000                                                            | 7   | 24              | 89.9              | (10)      |
| 5 nM                      | 2.5 mg/L @ 24 h*                  | n/a                                                              | 7.5 | 24              | 85.2              | (11)      |
| 25 nM                     | 2.5 mg/L @ 24 h*                  | n/a                                                              | 7.5 | 24              | 82.7              | (11)      |
| 25 nM                     | 2.5 mg/L                          | 1408                                                             | 7   | 24              | ~91               | (12)      |
| 3 µM                      | 2.5 mM                            | 833                                                              | 7   | 120             | 42.2              | (13)      |
| 200 nM                    | 100 mg/L                          | 7042                                                             | 7.5 | 120             | 80.5              | (8)       |
| 160 nM                    | 3 mg/L                            | 264                                                              | 7.5 | 120             | 78.4              | (9)       |
| 2.5 µM                    | 43 µM                             | 17.2                                                             | 8   | 30              | 97                | (3)       |
| 15 µM                     | 270 µM                            | 18                                                               | 8   | 11              | 89.9              | (14)      |

\*Chloramine residual after SDS testing

**Table S2:** Kinetic model equations for chloramine evolution and nitrosamine formation. Reprinted from McCurry, D.L.; Ishida, K.P.; Oelker, G.L.; Mitch, W.A. *Environ. Sci Technol.*, **2017**, *51*, 8589-8596. Copyright 2017 American Chemical Society.

| Reaction                                                                                           | k       | Rate Expression                                      | Units                         | Reference |
|----------------------------------------------------------------------------------------------------|---------|------------------------------------------------------|-------------------------------|-----------|
| $\text{HOCl} + \text{NH}_3 \rightarrow \text{NH}_2\text{Cl}$                                       | 3.1E+06 | $k[\text{HOCl}][\text{NH}_3]$                        | $\text{M}^{-1} \text{s}^{-1}$ | (15)      |
| $\text{NH}_2\text{Cl} \rightarrow \text{HOCl} + \text{NH}_3$                                       | 2.1E-05 | $k[\text{NH}_2\text{Cl}]$                            | $\text{s}^{-1}$               | (15)      |
| $\text{HOCl} + \text{NH}_2\text{Cl} \rightarrow \text{NHCl}_2$                                     | 2.8E+02 | $k[\text{HOCl}][\text{NH}_2\text{Cl}]$               | $\text{M}^{-1} \text{s}^{-1}$ | (15)      |
| $\text{NHCl}_2 \rightarrow \text{HOCl} + \text{NH}_2\text{Cl}$                                     | 6.5E-07 | $k[\text{NHCl}_2]$                                   | $\text{s}^{-1}$               | (15)      |
| <sup>a</sup> $\text{NH}_2\text{Cl} + \text{NH}_2\text{Cl} \rightarrow \text{NHCl}_2 + \text{NH}_3$ | 6.9E+03 | $k[[\text{H}^+][\text{NH}_2\text{Cl}]^2]$            | $\text{M}^2 \text{s}^{-1}$    | (15)      |
| $\text{NHCl}_2 + \text{NH}_3 \rightarrow \text{NH}_2\text{Cl} + \text{NH}_2\text{Cl}$              | 6.0E+04 | $k[[\text{H}^+][\text{NHCl}_2][\text{NH}_3]$         | $\text{M}^2 \text{s}^{-1}$    | (15)      |
| <sup>b</sup> $\text{NHCl}_2 \rightarrow \text{I}$                                                  | 1.1E+02 | $k[\text{NHCl}_2][\text{OH}^-]$                      | $\text{M}^{-1} \text{s}^{-1}$ | (15)      |
| $\text{I} + \text{NHCl}_2 \rightarrow \text{HOCl} + \text{prod}$                                   | 2.8E+04 | $k[\text{I}][\text{NHCl}_2]$                         | $\text{M}^{-1} \text{s}^{-1}$ | (15)      |
| $\text{I} + \text{NH}_2\text{Cl} \rightarrow \text{prod1}$                                         | 8.3E+03 | $k[\text{I}][\text{NH}_2\text{Cl}]$                  | $\text{M}^{-1} \text{s}^{-1}$ | (15)      |
| $\text{NHCl}_2 + \text{NH}_2\text{Cl} \rightarrow \text{prod2}$                                    | 1.5E-02 | $k[\text{NHCl}_2][\text{NH}_2\text{Cl}]$             | $\text{M}^{-1} \text{s}^{-1}$ | (15)      |
| $\text{HOCl} + \text{NHCl}_2 \rightarrow \text{NCl}_3$                                             | 3.3E+09 | $k[\text{HOCl}][\text{NHCl}_2][\text{OH}^-]$         | $\text{M}^2 \text{s}^{-1}$    | (15)      |
| $\text{NCl}_3 \rightarrow \text{HOCl} + \text{NHCl}_2$                                             | 3.2E-05 | $k[\text{NCl}_3]$                                    | $\text{s}^{-1}$               | (16)      |
| $\text{NHCl}_2 + \text{NCl}_3 \rightarrow \text{HOCl} + \text{HOCl} + \text{prod4}$                | 5.6E+10 | $k[\text{NHCl}_2][\text{NCl}_3][\text{OH}^-]$        | $\text{M}^2 \text{s}^{-1}$    | (15)      |
| $\text{NH}_2\text{Cl} + \text{NCl}_3 \rightarrow \text{HOCl} + \text{prod5}$                       | 1.4E+09 | $k[\text{NH}_2\text{Cl}][\text{NCl}_3][\text{OH}^-]$ | $\text{M}^2 \text{s}^{-1}$    | (15)      |
| $\text{DMA} + \text{HOCl} \rightarrow \text{DMACI}$                                                | 6.1E+07 | $k[\text{DMA}][\text{HOCl}]$                         | $\text{M}^{-1} \text{s}^{-1}$ | (17)      |
| $\text{DMAH}^+ + \text{NH}_2\text{Cl} \rightarrow \text{DMACI} + \text{NH}_4^+$                    | 2.1E-01 | $k[\text{DMAH}^+][\text{NH}_2\text{Cl}]$             | $\text{M}^{-1} \text{s}^{-1}$ | (18)      |
| $\text{DMACI} + \text{NH}_4^+ \rightarrow \text{NH}_2\text{Cl} + \text{DMAH}^+$                    | 5.8E-03 | $k[\text{DMACI}][\text{NH}_4^+]$                     | $\text{M}^{-1} \text{s}^{-1}$ | (18)      |
| $\text{NH}_2\text{Cl} + \text{DMA} \rightarrow \text{UDMH}$                                        | 8.1E-02 | $k[\text{NH}_2\text{Cl}][\text{DMA}]$                | $\text{M}^{-1} \text{s}^{-1}$ | (18)      |
| $\text{NH}_3 + \text{DMACI} \rightarrow \text{UDMH}$                                               | 4.9E-03 | $k[\text{NH}_3][\text{DMACI}]$                       | $\text{M}^{-1} \text{s}^{-1}$ | (18)      |
| $\text{NHCl}_2 + \text{DMA} \rightarrow \text{UDMHCl}$                                             | 5.2E+01 | $k[\text{NHCl}_2][\text{DMA}]$                       | $\text{M}^{-1} \text{s}^{-1}$ | (19)      |
| $\text{NHCl}_2 + \text{UDMH} \rightarrow \text{DMA} + \text{prod6}$                                | 4.5E+00 | $k[\text{NHCl}_2][\text{UDMH}]$                      | $\text{M}^{-1} \text{s}^{-1}$ | (20)      |
| $\text{NHCl}_2 + \text{UDMHCl} \rightarrow \text{prod7}$                                           | 7.5E-01 | $k[\text{NHCl}_2][\text{UDMHCl}]$                    | $\text{M}^{-1} \text{s}^{-1}$ | (19)      |
| $\text{UDMHCl} + \text{O}_2 \rightarrow \text{NDMA}$                                               | 1.4E+00 | $k[\text{UDMHCl}][\text{O}_2]$                       | $\text{M}^{-1} \text{s}^{-1}$ | (20)      |
| $\text{DMACI} \rightarrow \text{CH}_3\text{NCH}_2^+ + \text{Cl}^-$                                 | 4.2E-10 | $k[\text{DMACI}]$                                    | $\text{s}^{-1}$               | (21)      |
| Equilibrium                                                                                        | pKa     |                                                      |                               |           |
| $\text{HOCl} \rightleftharpoons \text{OCl}^-$                                                      | 7.5     |                                                      | -                             | (22)      |
| $\text{NH}_4^+ \rightleftharpoons \text{NH}_3 + \text{H}^+$                                        | 9.3     |                                                      | M                             | (22)      |
| $\text{DMAH}^+ \rightleftharpoons \text{DMA} + \text{H}^+$                                         | 10.7    |                                                      | M                             | (23)      |
| $\text{UDMH}^+ \rightleftharpoons \text{UDMH} + \text{H}^+$                                        | 7.2     |                                                      | M                             | (24)      |

<sup>a</sup> General acid catalysis by  $\text{H}_2\text{CO}_3$  ( $k = 7.5 \times 10^{-1} \text{ M}^{-2} \text{ s}^{-1}$ ) and  $\text{HCO}_3^-$  ( $k = 2.0 \times 10^{-3} \text{ M}^{-2} \text{ s}^{-1}$ ) was also included in the model. Carbonate acid catalysis rate constants retrieved from SI Reference 25.

<sup>b</sup> I is an unknown intermediate, and prod1, prod2, prod3, prod4, and prod5 refer to uncharacterized reaction products, potentially including  $\text{N}_2$ ,  $\text{NO}_3^-$ ,  $\text{H}^+$ ,  $\text{Cl}^-$



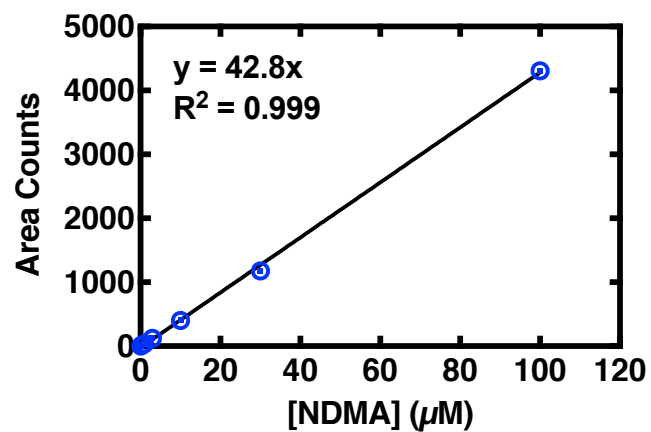

**Figure S1:** Example NDMA standard curve data generated from HPLC analysis. Standards (0.1, 0.3, 1, 3, 10, 30, 100  $\mu\text{M}$ ) were analyzed via HPLC as described in the manuscript. Calculated detection limit was 1  $\mu\text{M}$ .

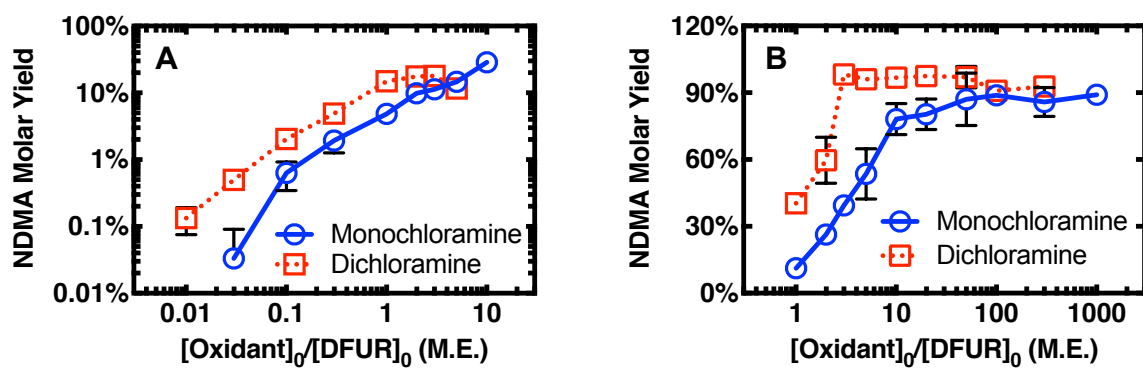

**Figure S2:** NDMA molar yield as a function of chloramine dose from DFUR. (A)  $[DFUR]_0 = 1000 \mu M$ ; (B)  $[DFUR]_0 = 10 \mu M$ .  $[PO_4 \text{ buffer}] = 10 \text{ mM}$ ,  $pH = 7.0$ ,  $T = 22 \pm 1 \text{ } ^\circ C$ ,  $t_{rxn} = 24 \text{ h}$ . All plotted points are the mean of three experimental replicates with 95% confidence interval error bars calculated based on Student's t-distribution (smaller than symbols when not shown).

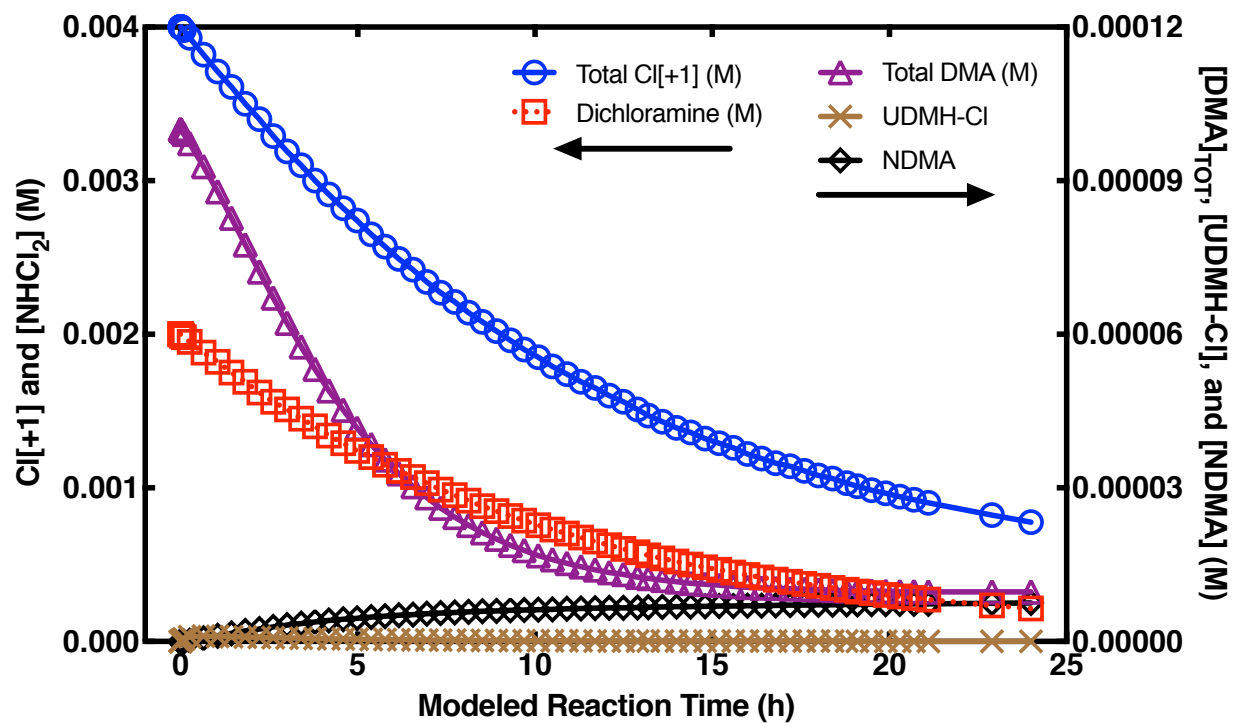

**Figure S3:** Modeled concentrations of total dimethylamine (including protonated dimethylamine), total chlorine residual, dichloramine, UDMH-Cl, and NDMA. Total chlorine and dichloramine concentrations are plotted on the left y-axis; total dimethylamine, UDMH-Cl, and NDMA concentrations are plotted on the right y-axis.  $[DMA]_0 = 100 \mu M$ ,  $[PO_4 \text{ buffer}] = 10 \text{ mM}$ ,  $pH = 7.0$ ,  $T = 22 \text{ }^\circ C$ ,  $t_{rxn} = 24 \text{ h}$ .

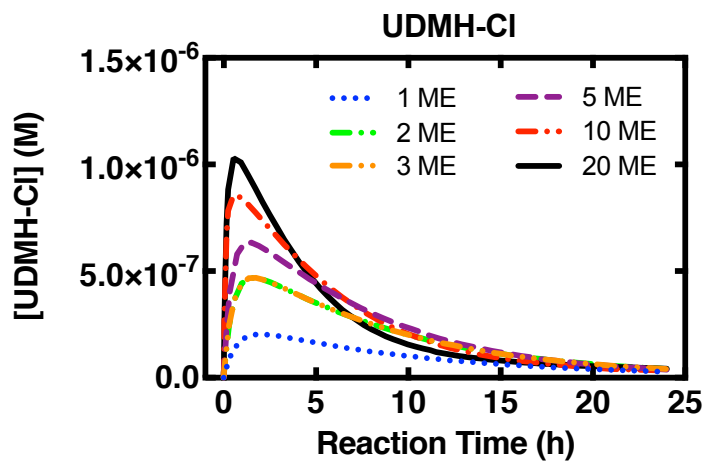

**Figure S4:** Modeled concentrations of UDMH-Cl.  $[\text{DMA}]_0 = 100 \mu\text{M}$ ,  $[\text{NHCl}_2]_0 = 100 \mu\text{M}$ , 200  $\mu\text{M}$ , 300  $\mu\text{M}$ , 500  $\mu\text{M}$ , 1 mM, or 2 mM,  $[\text{PO}_4 \text{ buffer}] = 10 \text{ mM}$ ,  $\text{pH} = 7.0$ ,  $T = 22 \text{ }^\circ\text{C}$ .

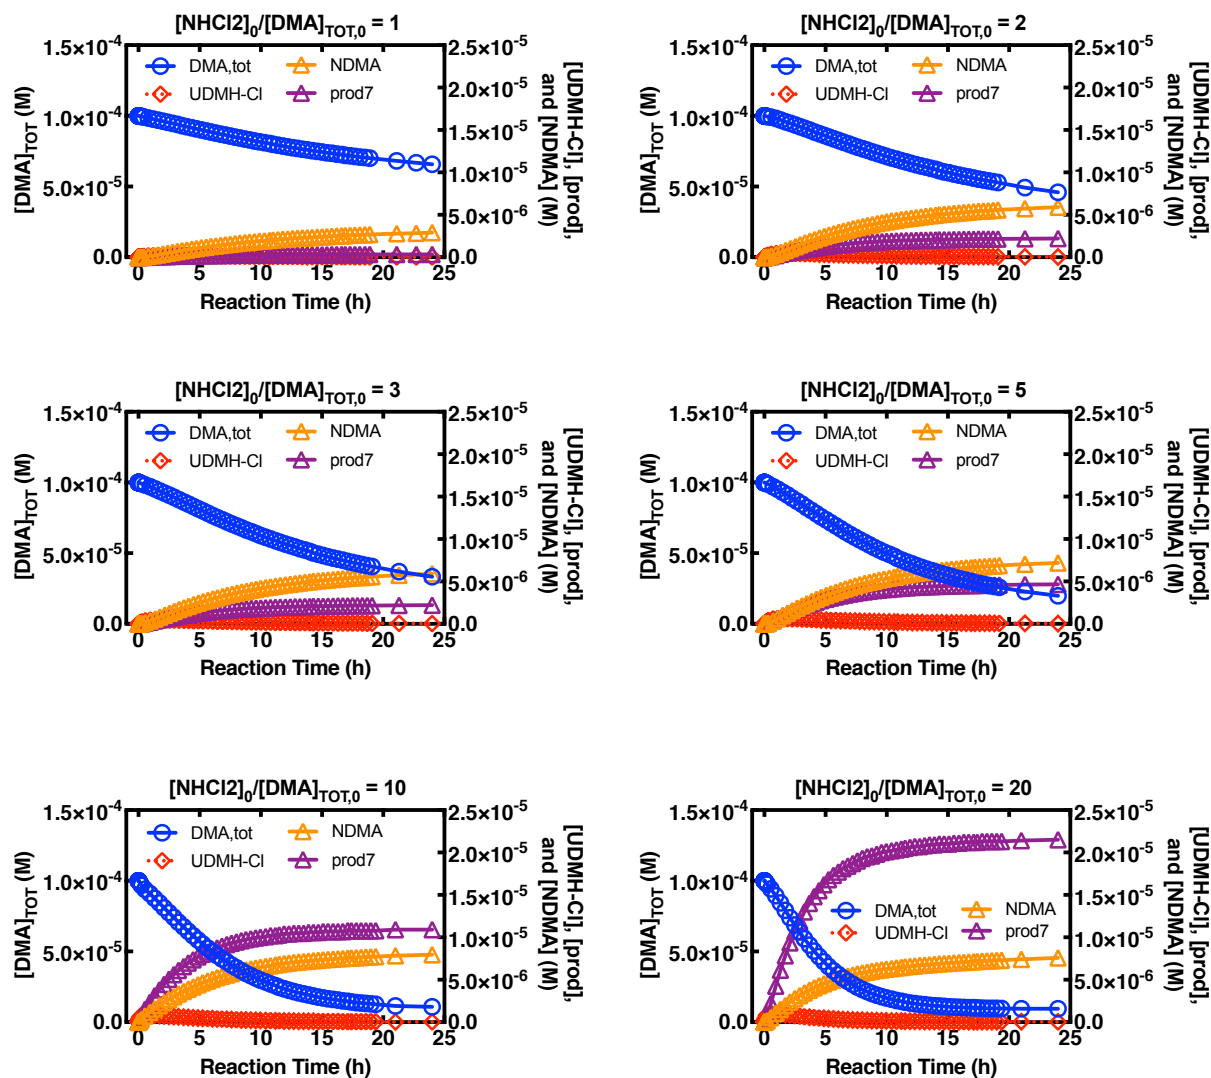

**Figure S5:** Computationally modeled concentrations of total dimethylamine (including protonated dimethylamine), dichloramine, UDMH-Cl, NDMA, and unidentified product 7 ('prod7'). DMA concentrations plotted on the left y-axis; all other concentrations plotted on the right y-axis.  $[DMA]_0 = 100 \mu M$ ,  $[NHCl_2]_0 = 100 \mu M$ ,  $200 \mu M$ ,  $300 \mu M$ ,  $500 \mu M$ ,  $1 \text{ mM}$ , or  $2 \text{ mM}$ ,  $[PO_4 \text{ buffer}] = 10 \text{ mM}$ ,  $pH = 7.0$ ,  $T = 22 \text{ }^\circ C$ .

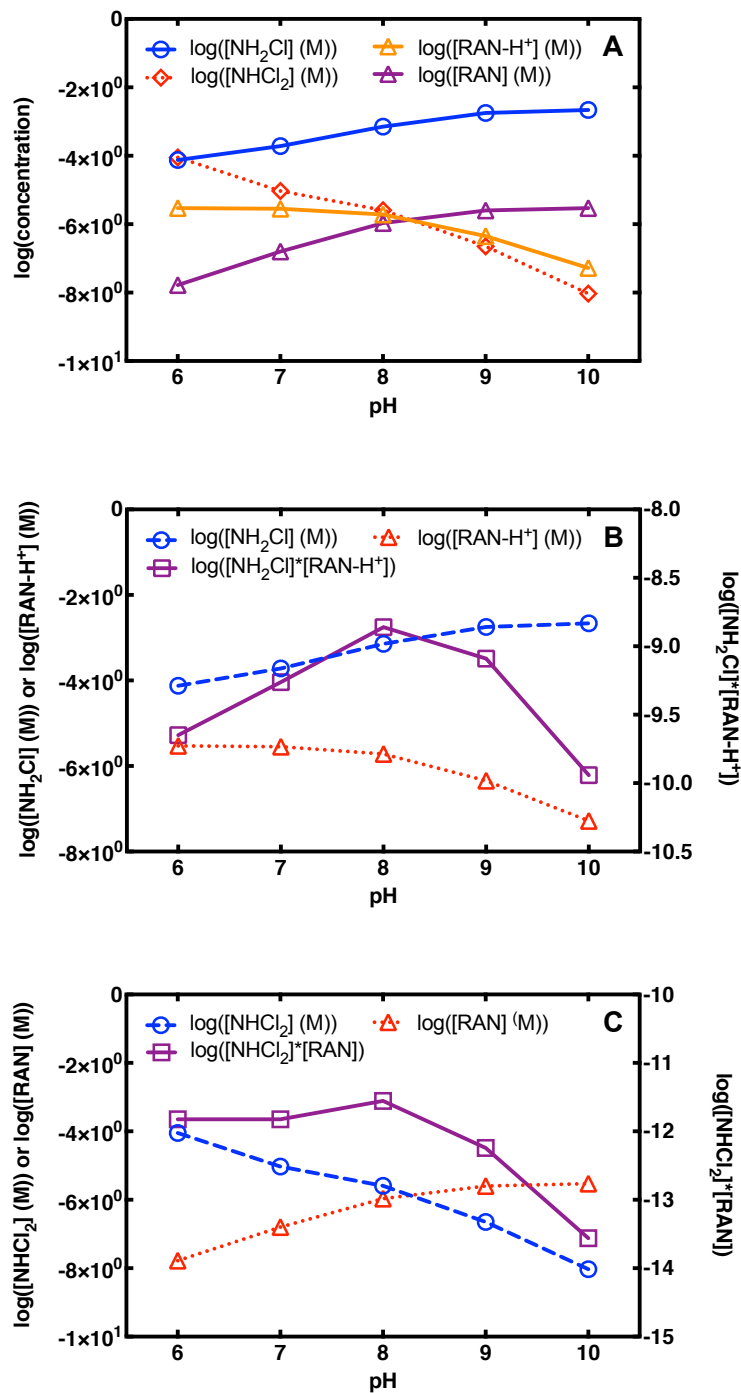

**Figure S6:** Modeled concentrations of monochloramine, dichloramine, ranitidine, and protonated ranitidine with respect to pH. (A) shows all concentrations; (B) shows monochloramine, protonated ranitidine, and their concentration product; (C) shows dichloramine, neutral ranitidine, and their concentration product; individual concentrations plotted on the left y-axis; concentration products plotted on the right y-axis.  $[\text{RAN}]_0 = 3 \mu\text{M}$ ,  $[\text{NH}_2\text{Cl}]_0 = 2.5 \text{ mM}$   $[\text{PO}_4 \text{ buffer}] = 10 \text{ mM}$ , reaction time = 5 d.

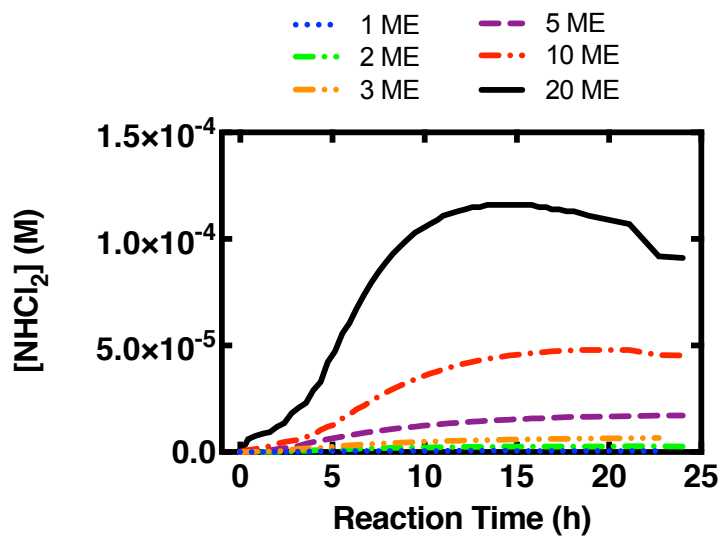

**Figure S7:** Modeled concentrations of dichloramine during simulated chloramination of dimethylamine.  $[\text{DMA}]_0 = 100 \mu\text{M}$ ,  $[\text{NHCl}_2]_0 = 100 \mu\text{M}$ ,  $200 \mu\text{M}$ ,  $300 \mu\text{M}$ ,  $500 \mu\text{M}$ ,  $1 \text{ mM}$ , or  $2 \text{ mM}$ ,  $[\text{PO}_4 \text{ buffer}] = 10 \text{ mM}$ ,  $\text{pH} = 7.0$ ,  $T = 22 \text{ }^\circ\text{C}$ .

## References

- (1) McCurry, D.L.; Ishida, K.P.; Oelker, G.L.; Mitch, W.A. Reverse osmosis induced shifts in chloramine speciation cause regrowth of NDMA in recycled wastewater. *Environ. Sci. Technol.*, **2017**, *51*, 8589-8596.
- (2) Schreiber, I.M.; Mitch, W.A. Influence of the order of reagent addition on NDMA Formation during chloramination. *Environ. Sci. Technol.*, **2005**, *39*, 3811-3818.
- (3) Spahr, S.; Bolotin, J.; Schleucher, J.; Ehlers, I.; von Gunten, U.; Hofstetter, T.B. Compound-specific carbon, nitrogen, and hydrogen isotope analysis of *N*-nitrosodimethylamine in aqueous solutions. *Analytical Chem.* **2015**, *87*, 2916-2924.
- (4) Mitch, W.A.; Gerecke, A.C.; Sedlak, D.L. A *N*-Nitrosodimethylamine (NDMA) precursor analysis for chlorination of water and wastewater. *Water Res.*, **2003**, *37*, 3733-3741.
- (5) Mitch, W.A.; Sedlak, D.L. Formation of *N*-nitrosodimethylamine from dimethylamine during chlorination. *Environ. Sci. Technol.*, **2002**, *36*, 588-595.
- (6) Lee, C. Schmidt, C.; Yoon, J.; von Gunten, U. Oxidation of *N*-nitrosodimethylamine (NDMA) precursors with ozone and chlorine dioxide: Kinetics and effect on NDMA formation potential. *Environ. Sci. Technol.*, **2007**, *41*, 2056-2063.
- (7) Le Roux, J.; Gallard, H.; Croué, J.-P. Formation of NDMA and halogenated DBPs by chloramination of tertiary amines: The influence of bromide ion. *Environ. Sci. Technol.*, **2012a**, *46*, 1581-1589.
- (8) Selbes. M.; Kim, D.; Ates, N.; Karanfil, T. The roles of tertiary amine structure, background organic matter and chloramine species on NDMA formation. *Water Res.*, **2013**, *47*, 945-953.
- (9) Selbes. M.; Kim, D.; Karanfil, T. The effect of pre-oxidation on NDMA formation and the influence of pH. *Water Res.*, **2014**, *66*, 169-179.
- (10) Shen, R.; Andrews, S. Demonstration of 20 pharmaceuticals and personal care products (PPCPs) as nitrosamine precursors during chloramine disinfection. *Water Res.*, **2011a**, *45*, 944-952.
- (11) Shen, R.; Andrews, S. NDMA formation kinetics from three pharmaceuticals in four water matrices. *Water Res.*, **2011b**, *45*, 5687-5694.
- (12) Shen, R.; Andrews, S. Formation of NDMA from ranitidine and sumatriptan: The role of pH. *Water Res.*, **2013**, *47*, 802-810.
- (13) Le Roux, J.; Gallard, H.; Croué, J.-P. Chloramination of nitrogenous contaminants (pharmaceuticals and pesticides): NDMA and halogenated DBPs formation. *Water Res.*, **2011**, *45*, 3164-3174.



- (14) Spahr, S. Cirpka, O.A.; von Gunten, U.; Hofstetter, T.B. Formation of *N*-nitrosodimethylamine during chloramination of secondary and tertiary amines: Role of molecular oxygen and radical intermediates. *Environ. Sci. Technol.*, **2017**, *51*, 280-290.
- (15) Jafvert, C. T.; Valentine, R. L. Reaction scheme for the chlorination of ammoniacal water. *Environ. Sci. Technol.* **1992**, *26*, 577-586.
- (16) Saguinsin, J. L.; Morris, J. C. In *Disinfection Water and Wastewater*; Johnson, J. D., Ed.; Ann Arbor Science Publishers Inc.: Ann Arbor, MI, 1975; pp 277-299.
- (17) Abia, L.; Armesto, X. L.; Canle, M.; Garcia, M. V.; Santaballa, J. A. Oxidation of aliphatic amines by aqueous chlorine. *Tetrahedron* **1998**, *54*, 521-530.
- (18) Delalu, H.; Marchand, A. Modélisation générale des processus réactionnels intervenant au cours de la synthèse de la diméthylhydrazine asymétrique par le procédé raschig. Quantification des produits de dégradation (hydrazone). I. Formulation du modèle validité en milieu dilué. Interprétation. *J. Chim. Phys.-Chim. Biol.* **1989**, *86*, 2149-2162.
- (19) Yagil, G.; Anbar, M. The kinetics of hydrazine formation from chloramine and ammonia. *J. Am. Chem. Soc.* **1962**, *84*, 1797-1803.
- (20) Schreiber, I. M.; Mitch, W. A. Nitrosamine formation pathway revisited: the importance of dichloramine and dissolved oxygen. *Environ. Sci. Technol.* **2006**, *40*, 6007-6014.
- (21) Stephan, J.; Pasquet, V.; Elkhatib, M.; Goutelle, V.; Delalu, H. *Int. J. Chem. Kinetics* **2008**, *40*, 340-351.
- (22) Snoeyink, V. L.; Jenkins, D. In *Water Chemistry*; John, Wiley & Sons, Inc., 1980; pp 368-399.
- (23) Mitch, W. A.; Sedlak, D. L. Formation of *N*-nitrosodimethylamine (NDMA) from dimethylamine during chlorination. *Environ. Sci. Technol.* **2002**, *36*, 588-595.
- (24) Hinman, R. Base strengths of some alkylhydrazines. *J. Org. Chem.* **1958**, *23*, 1587-1588.
- (25) Valentine, R.L.; Jafvert, C.T. General acid catalysis of monochloramine diproportionation. *Environ. Sci. Technol.*, **1988**, *22*, 691-696.
